# Supplementary material for: Hepatocyte-Specific Deficiency of BAP31 Amplified Acetaminophen-Induced Hepatotoxicity via Attenuating Nrf2 Signaling Activation in Mice
Source: MDPI journal article supplement (doi:10.3390/ijms221910788), 2021-10-05
Supplement: s1 [file s1]

**Table S1. Primer sequences for real-time PCR**

| <b>Genes</b>  | <b>Forward (5'→3')</b>  | <b>Reverse (5'→3')</b>  |
|---------------|-------------------------|-------------------------|
| Atp5a1        | GAGAGCAGCCAAGATGAACG    | GACACGGGACACAGACAAAC    |
| Catalase      | AGGAGGCAGAACTTTCCCA     | GGCCCTGAAGCATTTTGTCA    |
| Cxcl-10       | CCAAGTGCTGCCGTCATTTTC   | GGCTCGCAGGGATGATTTCAA   |
| Cyp2e1        | CGTTGCCTTGCTTGTCTGGA    | AAGAAAGGAATTGGGAAAGGTCC |
| Cyp4a10       | AGAACTTCCCAAGTGCCTTTC   | GCAAACCATACCCATTAGCCTTT |
| Cyes          | G TTCAGAAAGTGTGCCCAGTG  | GTCTGCCCTTTCTCCCTTCT    |
| Gclc          | GGGGTGACGAGGTGGAGTA     | GTTGGGGTTTGTCTCTCCC     |
| Ho-1          | AAGCCGAGAATGCTGAGTTCA   | GCCGTGTAGATATGGTACAAGGA |
| IL-6          | AGTTGCCTTCTTGGGACTGA    | CAGAATTGCCATTGCACAAC    |
| IL-1 $\beta$  | GACCTTCCAGGATGAGGACA    | AGCTCATATGGGTCCGACAG    |
| Gpx1          | GTGCAATCAGTTCGGACACCA   | CACCAGGTCCGACGTACTTG    |
| Gpx2          | GCCTCAAGTATGTCCGACCTG   | GGAGAACGGGTCATCATAAGGG  |
| Mcp1          | TTAAAAACCTGGATCGGAACCAA | GCATTAGCTTCAGATTTACGGGT |
| Mip1 $\alpha$ | TTCTCTGTACCATGACACTCTGC | CGTGGAATCTTCCGGCTGTAG   |
| Nox2          | TGTGGTTGGGGCTGAATGTC    | CTGAGAAAGGAGAGCAGATTTCG |
| Nqo1          | AGGATGGGAGGTACTCGAATC   | AGGCGTCCTTCCTTATATGCTA  |
| Nrf2          | TCTTGGAGTAAGTCGAGAAGTGT | GTTGAAACTGAGCGAAAAAGGC  |
| Saa1          | TCATTTGTTACGAGGCTTTC    | CTTTGAGCAGCATCATAGTTCC  |
| Saa2          | TGGCTGGAAAGATGGAGACAA   | AAAGCTCTCTCTTGCATCACTG  |
| Sod1          | AACCAGTTGTGTTGTCAGGAC   | CCACCATGTTTCTTAGAGTGAGG |
| Sod2          | CAGACCTGCCTTACGACTATGG  | CTCGGTGGCGTTGAGATTGTT   |
| Tfam          | GCAGCTAACTCCAAGTCAGC    | CCGAATCATCCTTTGCCTCC    |
| TNF $\alpha$  | CCCTCACACTCAGATCATCTTCT | GCTACGACGTGGGCTACAG     |
| Trx-1         | CATGCCGACCTTCCAGTTTAA   | TTTCCTTGTTAGCACCGGAGA   |
| 18S           | AGTCCCTGCCCTTTGTACACA   | CGATCCGAGGGCCTCACTA     |

**Table S2: List of antibodies used in this study**

| <b>Antibody</b> | <b>Isotype</b> | <b>Cat#</b> | <b>Source</b> | <b>Dilution</b> |
|-----------------|----------------|-------------|---------------|-----------------|
| Nrf2            | Rabbit IgG     | #12721      | CST           | 1:1000          |
| Nqo1            | Goat IgG       | ab2346      | Abcam         | 1:2000          |
| Gclc            | Rabbit IgG     | ab53179     | Abcam         | 1:2000          |
| TNF $\alpha$    | Rabbit IgG     | #3707       | CST           | 1:1000          |
| GSTA1           | Rabbit IgG     | abs136034   | Absin         | 1:2000          |
| BAP31           | Goat IgG       | ab10924     | Abcam         | 1:2000          |
| JNK             | Rabbit IgG     | #9252       | CST           | 1:1000          |
| p-JNK           | Rabbit IgG     | #4668       | CST           | 1:1000          |
| GAPDH           | Rabbit IgG     | #2118       | CST           | 1:5000          |

CST: cell signaling technology. Absin: Absin Bioscience Inc.
